# Supplementary material
Source: PubMed Central journal article supplement (PMC7375140)

## Figure Legends for Supplemental Figures

**Supplemental Figure 1.** Typical examples of myocardial infarction induced by 20-min coronary artery occlusion and 3-h reperfusion in normotensive, transgene-negative Hannover Sprague-Dawley rat (HanSD) and in hypertensive, heterozygous Ren-2 renin transgenic rats (TGR), untreated (control) or treated with soluble epoxide hydrolase inhibitor alone (sEHi), or treated with epoxyeicosatrienoic acid analog alone (EET-A) or treated with combination of sEHi and EET-A. Brown color represents normally perfused tissue stained by potassium permanganate. Red area, tetrazolium positive, represents tissue surviving the occlusion and the pale area, tetrazolium negative, represents infarcted tissue.

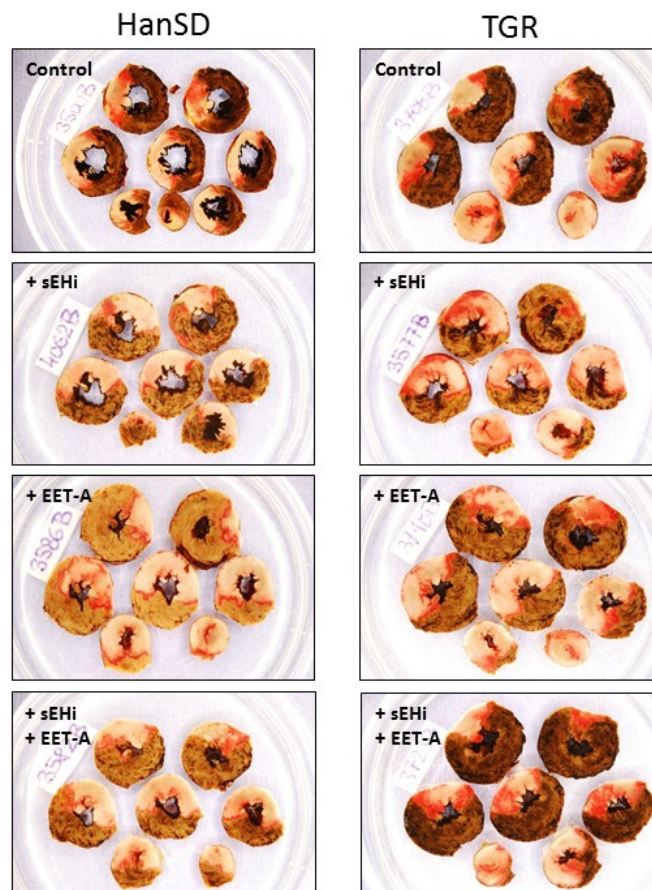

**Supplemental Figure 2.** Representative electrocardiogram recordings showing single ventricle premature complexes (S), doublet ventricle premature complexes (D), ventricular tachycardia (VT) and ventricular fibrillation (VF) during 20-min coronary artery occlusion.

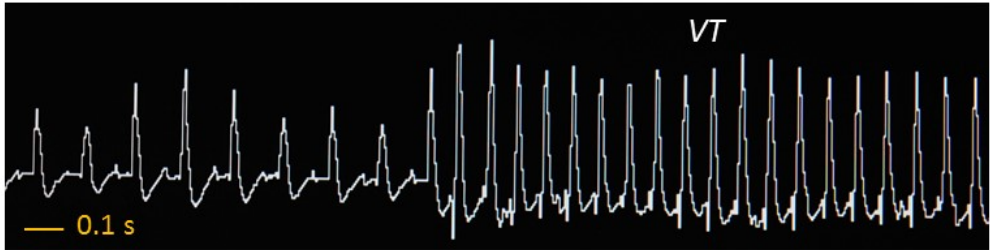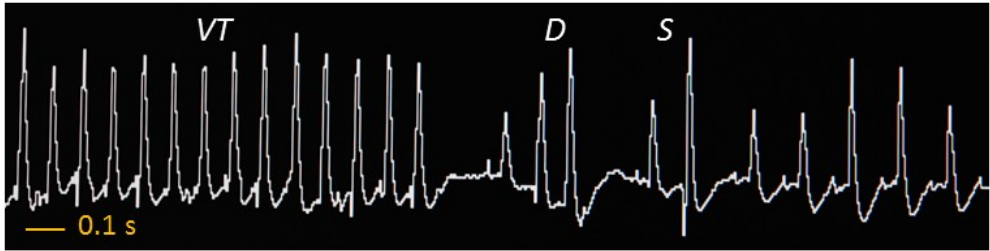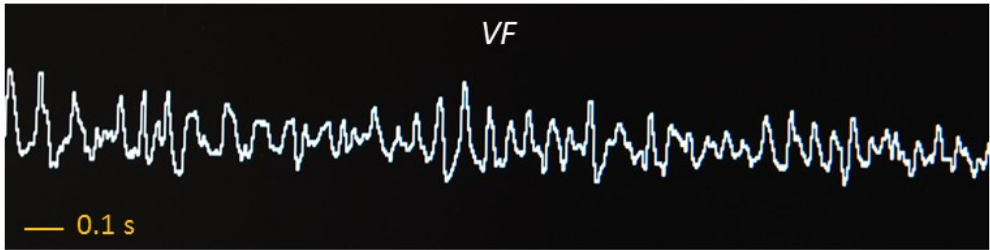

Supplement: NIHMS1609196-supplement-Supplement.pdf [file NIHMS1609196-supplement-Supplement.pdf]
